# Supplementary material for: A systematic review of health economic models of opioid agonist therapies in maintenance treatment of non-prescription opioid dependence
Source: PubMed Central journal article supplement (PMC5324212; doi:10.1186/s13722-017-0071-3), 2017-02-24
Supplement: 13722_2017_71_MOESM2_ESM.pdf [file 13722_2017_71_MOESM2_ESM.pdf]

## Additional file 2. Excluded publications and reason for exclusion

| Full reference                                                                                                                                                                                                                                            | Reason for exclusion                          |
|-----------------------------------------------------------------------------------------------------------------------------------------------------------------------------------------------------------------------------------------------------------|-----------------------------------------------|
| Barnett PGH, S. S. The cost-effectiveness of methadone maintenance. Mt Sinai J Med 2000;67(5-6):365-74.                                                                                                                                                   | Review                                        |
| Barnett PG. The cost-effectiveness of substance abuse treatment. Curr Psychiatry Rep 1999;1(2):166-71.                                                                                                                                                    | Review                                        |
| Doran CM. Economic evaluation of interventions to treat opiate dependence: A review of the evidence. PharmacoEconomics 2008;26(5):371-93.                                                                                                                 | Review                                        |
| Gastfriend DR. A pharmaceutical industry perspective on the economics of treatments for alcohol and opioid use disorders. Ann N Y Acad Sci 2014;1327:112-30.                                                                                              | Review                                        |
| Krupitsky E. Injectable extended-release naltrexone for the prevention of relapse to opioid dependence following opioid detoxification. Neuropsychiatry 2012;2(4):355-62.                                                                                 | Review                                        |
| Lintzeris N. Prescription of heroin for the management of heroin dependence: current status. CNS Drugs 2009;23(6):463-76.                                                                                                                                 | Review                                        |
| McCarty D. The cost effectiveness of treatment with extended-release naltrexone: A structured review across four studies. Alcohol Clin Exp Res 2012;36:342A                                                                                               | Review                                        |
| Moore TJR, A.; Caulkins, J. P. The costs and consequences of three policy options for reducing heroin dependency. Drug Alcohol Rev 2007;26(4):369-78.                                                                                                     | Review                                        |
| Simoens SL, A.; Matheson, C.; Bond, C. Pharmaco-economics of community maintenance for opiate dependence: a review of evidence and methodology. Drug Alcohol Depend 2006;84(1):28-39.                                                                     | Review                                        |
| Vanagas GP, Z.; Bagdonas, E. Cost-utility analysis of methadone maintenance treatment: a methodological approach. Subst Use Misuse 2006;41(1):87-101.                                                                                                     | Review                                        |
| Goldschmidt P.G. A cost-effectiveness model for evaluating health care programs: application to drug abuse treatment. Inquiry 1976 13 (1): 29-47                                                                                                          | Outdated, more than 30 years old              |
| Sirotnik, K. A.; Bailey, R. C. A cost-benefit analysis for a multimodality heroin treatment project. International Journal of the Addictions. 1975 10(3): 443-451                                                                                         | Outdated, more than 30 years old              |
| Byford SB, B.; Metrebian, N.; Groshkova, T.; Cary, M.; Charles, V.; Lintzeris, N.; Strang, J. Cost-effectiveness of injectable opioid treatment v. oral methadone for chronic heroin addiction. Br J Psychiatry 2013;203(5):341-9.                        | Economic evaluations alongside clinical study |
| Dijkgraaf MGvdZ, B. P.; de Borgie, C. A.; Blanken, P.; van Ree, J. M.; van den Brink, W. Cost utility analysis of co-prescribed heroin compared with methadone maintenance treatment in heroin addicts in two randomised trials. BMJ 2005;330(7503):1297. | Economic evaluations alongside clinical study |
| Doran CM. Buprenorphine, buprenorphine/naloxone and methadone maintenance: a cost-effectiveness analysis. Expert rev 2005;5(5):583-91.                                                                                                                    | Economic evaluations alongside clinical study |
| Doran CMS, M.; Digiusto, E.; O'Brien, S.; Mattick, R. P. Cost-effectiveness analysis of maintenance agonist treatments in the NEPOD. Expert rev 2006;6(4):437-46.                                                                                         | Economic evaluations alongside clinical study |
| Doran CMS, M.; Mattick, R. P.; Ali, R.; White, J.; Bell, J. Buprenorphine versus methadone maintenance: a cost-effectiveness analysis. Drug Alcohol Depend 2003;71(3):295-302.                                                                            | Economic evaluations alongside clinical study |
| Harris AHG, E.; Ritter, A. J. A randomised trial of the cost effectiveness of buprenorphine as an alternative to methadone maintenance treatment for heroin dependence in a primary care setting. Pharmacoeconomics 2005;23(1):77-91.                     | Economic evaluations alongside clinical study |
| Harwood H, Hubbard RL, Collins JJ, et al. Cost Benefit of Drug Abuse Treatment. Research in Law and Policy Studies 1995;3:191-214.                                                                                                                        | Economic evaluations alongside clinical study |

|                                                                                                                                                                                                                                                                                                                     |                                               |
|---------------------------------------------------------------------------------------------------------------------------------------------------------------------------------------------------------------------------------------------------------------------------------------------------------------------|-----------------------------------------------|
| Maas JB, G.; Maskrey, V.; Pinto, H.; Holland, R. Economic evaluation: a comparison of methadone versus buprenorphine for opiate substitution treatment. <i>Drug Alcohol Depend</i> 2013;133(2):494-501.                                                                                                             | Economic evaluations alongside clinical study |
| Marino VL, C. Buprenorphine/naloxone versus buprenorphine and methadone in heroin addiction detoxification: An Italian cost-utility analysis. <i>Value Health</i> 2011;14 (7):A293.                                                                                                                                 | Economic evaluations alongside clinical study |
| National Drug and Alcohol Research Centre. National Evaluation of Pharmacotherapies for Opioid Dependence (NEPOD): Report of Results and Recommendations. Sidney, Australia: University of New South Wales, 2001.                                                                                                   | Economic evaluations alongside clinical study |
| Nosyk BG, D. P.; Bansback, N. J.; Oviedo-Joekes, E.; Brissette, S.; Marsh, D. C.; Meikleham, E.; Schechter, M. T.; Anis, A. H. Cost-effectiveness of diacetylmorphine versus methadone for chronic opioid dependence refractory to treatment. <i>CMAJ Canadian Medical Association Journal</i> 2012;184(6):E317-28. | Economic evaluations alongside clinical study |
| Ruger JPC, M.; Mazlan, M.; Ng, N.; Schottenfeld, R. Cost-effectiveness of buprenorphine and naltrexone treatments for heroin dependence in Malaysia. <i>PLoS One</i> 2012;7(12):e50673.                                                                                                                             | Economic evaluations alongside clinical study |
| Russell CM, N. A cost-effectiveness analysis of extending methadone and buprenorphine-naloxone maintenance treatment of opioid dependence from eight to sixteen months. <i>Value Health</i> 2013;16 (3):A61.                                                                                                        | Economic evaluations alongside clinical study |
| Sheerin IG, T.; Sellman, D.; Adamson, S.; Deering, D. Reduction in crime by drug users on a methadone maintenance therapy programme in New Zealand. <i>N Z Med J</i> 2004;117(1190):U795.                                                                                                                           | Economic evaluations alongside clinical study |
| Strang JM, J.; Cummins, M.; Farrell, M.; Finch, E.; Gossop, M.; Stewart, D.; Welch, S. Randomized trial of supervised injectable versus oral methadone maintenance: report of feasibility and 6-month outcome. <i>Addiction</i> 2000;95(11):1631-45.                                                                | Economic evaluations alongside clinical study |
| Taylor ML, L.; McKeganey, N. An economic analysis of the impact of crime and hospitalisation associated with different interventions for opioid abuse in the United Kingdom. <i>Value Health</i> 2011;14 (7):A291.                                                                                                  | Economic evaluations alongside clinical study |
| Vanagas GP, Z.; Bagdonas, E. Cost-utility analysis of methadone maintenance treatment in Lithuania. <i>Medicina (Kaunas)</i> 2010;46(4):286-92.                                                                                                                                                                     | Economic evaluations alongside clinical study |
| Warren EV, R.; Shearer, J.; Shanahan, M.; Wodak, A.; Dolan, K. Value for money in drug treatment: economic evaluation of prison methadone. <i>Drug Alcohol Depend</i> 2006;84(2):160-6.                                                                                                                             | Economic evaluations alongside clinical study |
| Barnett PGS, J. L.; Wong, W.; Haug, N. A.; Hall, S. M. Effect of incentives for medication adherence on health care use and costs in methadone patients with HIV. <i>Drug Alcohol Depend</i> 2009;100(1-2):115-21.                                                                                                  | Non-CEA model based cost analysis             |
| Baser OC, M.; Fiellin, D. A.; Gastfriend, D. R. Cost and utilization outcomes of opioid-dependence treatments. <i>Am J Manag Care</i> 2011;17 Suppl 8:S235-48.                                                                                                                                                      | Non-CEA model based cost analysis             |
| Geitona MC, V.; Petratos, P. Economic evaluation of opioid substitution treatment in Greece. <i>Heroin Addiction and Related Clinical Problems</i> 2012;14(3):77-88.                                                                                                                                                | Non-CEA model based cost analysis             |
| Geitona MC, V.; Petratos, P.; Androutsou, L. Economic evaluation of opioid substitution treatment (OST) in Greece. <i>Value Health</i> 2012;15 (7):A512.                                                                                                                                                            | Non-CEA model based cost analysis             |
| Martinez-Raga JC, M. A.; Gonzalez Saiz, F.; Onate, J. Budgetary impact analysis of buprenorphine/naloxone (suboxone) in opioid maintenance treatment in Spain. <i>Value Health</i> 2011;14 (7):A289.                                                                                                                | Non-CEA model based cost analysis             |
| Martinez-Raga JG-S, F.; Onate, J.; Oyaguez, I.; Sabater, E.; Casado, M. A. Budgetary impact analysis of buprenorphine-naloxone combination (Suboxone) in Spain. <i>Health Econ Rev</i> 2012;2(1):3.                                                                                                                 | Non-CEA model based cost analysis             |
| Martinez-Raga JGS, F.; Pascual, C.; Casado, M. A.; Sabater Torres, F. J. Suboxone (buprenorphine/naloxone) as an agonist opioid treatment in Spain: a budgetary impact analysis. <i>Eur Addict Res</i> 2010;16(1):31-42.                                                                                            | Non-CEA model based cost analysis             |
| Reutsch CS, C. A.; Tkacz, J. Cost-effectiveness of medication-replacement therapy with buprenorphine among opioid-dependent patients: Results from a retrospective analysis of health plan membership claims data. <i>J Manage Care Pharm</i> 2009;15 (7):578-79.                                                   | Non-CEA model based cost analysis             |

|                                                                                                                                                                                                                                                   |                                   |
|---------------------------------------------------------------------------------------------------------------------------------------------------------------------------------------------------------------------------------------------------|-----------------------------------|
| Rosenheck R, Kosten T. Buprenorphine for opiate addiction: potential economic impact. <i>Drug Alcohol Depend</i> 2001;63(3):253-62.                                                                                                               | Non-CEA model based cost analysis |
| Ruetsch CT, J. Buprenorphine-medication assisted treatment: A retrospective analysis of health plan data. <i>Am J Addict</i> 2010;19 (4):368-69.                                                                                                  | Non-CEA model based cost analysis |
| Tkacz JU, H.; Leader Jr, D.; Ruetsch, C. The effectiveness of buprenorphine-medication assisted treatment among aetna's opioid dependent members: An analysis of health care costs and service utilization. <i>Value Health</i> 2011;14 (3):A191. | Non-CEA model based cost analysis |
| Zaric GSB, A. W.; Varenbut, M.; Daiter, J. M. The cost of providing methadone maintenance treatment in Ontario, Canada. <i>Am J Drug Alcohol Abuse</i> 2012;38(6):559-66.                                                                         | Non-CEA model based cost analysis |
