# Supplementary material for: A systematic review of health economic models of opioid agonist therapies in maintenance treatment of non-prescription opioid dependence
Source: Addict Sci Clin Pract. 2017 Feb 24;12:6. doi: 10.1186/s13722-017-0071-3 (PMC5324212; doi:10.1186/s13722-017-0071-3)
Supplement: Supplementary file 4 — Additional file 4. Summary of outcome parameters and source reported. [file 13722_2017_71_MOESM4_ESM.pdf]

## Additional File 4. Summary of outcome parameters and source reported

| Reference             | Outcome                                 | Source                                                                                                                                                                                                         |
|-----------------------|-----------------------------------------|----------------------------------------------------------------------------------------------------------------------------------------------------------------------------------------------------------------|
| Barnett (1999)<br>[1] | Annual mortality rate in 25 year olds   | US life tables                                                                                                                                                                                                 |
|                       | Mortality rates on MMT                  | Based on a Swedish study comparing two groups of heroin addicts with different access to methadone                                                                                                             |
|                       | Mortality rates not on MMT              | Based on a Swedish study comparing two groups of heroin addicts with different access to methadone                                                                                                             |
| Barnett (2001)<br>[2] | For untreated population, MMT, and BMT: |                                                                                                                                                                                                                |
|                       | * Annual number of injections           | Combination references sourced via literature review, details of which are reported in another paper by same authors. Assumptions also used, e.g. % in MMT in a given year that will detoxify successfully and |
|                       | * % of injections that are shared       |                                                                                                                                                                                                                |
|                       | * Annual number of sexual partners      |                                                                                                                                                                                                                |

| Reference               | Outcome                                 | Source                                                                                                                                      |
|-------------------------|-----------------------------------------|---------------------------------------------------------------------------------------------------------------------------------------------|
|                         | * Mortality rate from non-HIV causes    | cease further IDU                                                                                                                           |
|                         | * Success detox and cease treatment     |                                                                                                                                             |
|                         | Short term efficacy of MMT and BMT      | Meta-analysis on short term use, assumption that short term efficacy the same as long term outcomes                                         |
| Masson<br>(2004) [3]    | Mean days of heroin use (self-reported) | Based on RCT comparing MMT to 180-day psychosocially enriched detoxification for treatment of opioid dependence                             |
|                         | Urine toxicology screening              |                                                                                                                                             |
| Negrin (2006)<br>[4]    | Treatment retention rates               | 12 month data obtained from a multicentre study comparing three MMT programmes in five drug treatment centres in Barcelona                  |
| Schackman<br>(2012) [5] | Treatment retention rates on BMT        | Derived from prospective observational cohort study of 53 long term opioid users treated with office-based BUP/NAL in primary care setting. |
|                         | Illicit drug use while on BMT           |                                                                                                                                             |

| Reference             | Outcome                                 | Source                                                                                                                                                                                                                                                                                                                                                                                                        |
|-----------------------|-----------------------------------------|---------------------------------------------------------------------------------------------------------------------------------------------------------------------------------------------------------------------------------------------------------------------------------------------------------------------------------------------------------------------------------------------------------------|
|                       | Using illicit drugs while off treatment | Based on evidence from the National Treatment Outcome Research Study (NTORS). This was a study carried out by the National Addiction Centre in England and Wales between the years 1995 and 2000 - the largest UK drug treatment outcome study at the time. This study followed up the clients of a variety of drug treatment service types for up to five years, examining a wide range of outcome measures. |
| Sheerin<br>(2004) [6] | MMT treatment outcomes                  | Based on published reference which reports on addict death rates during a four year posttreatment follow-up.                                                                                                                                                                                                                                                                                                  |
|                       | HCV disease                             | Full details not reported in this paper. However, sources for HCV transition probabilities are reported in another reference by same authors on the costs of not treating hepatitis C virus infection in injecting drug users in New Zealand                                                                                                                                                                  |
| Stephen               | Completing MMT                          | Meta-analysis based on 15 studies MMT                                                                                                                                                                                                                                                                                                                                                                         |

| Reference           | Outcome                                                                                                                                                                           | Source                                                                                                                                          |
|---------------------|-----------------------------------------------------------------------------------------------------------------------------------------------------------------------------------|-------------------------------------------------------------------------------------------------------------------------------------------------|
| (2012) [7]          |                                                                                                                                                                                   |                                                                                                                                                 |
|                     | Completing with clean urine                                                                                                                                                       |                                                                                                                                                 |
|                     | Complications on DBS                                                                                                                                                              | Published reference on a decision analysis study of deep brain stimulation compared with bariatric surgery for the treatment of morbid obesity. |
| Tran ( 2012)<br>[8] | MMT treatment outcomes                                                                                                                                                            | Longitudinal cohort study across 6 MMT clinics in Vietnam                                                                                       |
|                     | Drug-use behaviour                                                                                                                                                                |                                                                                                                                                 |
|                     | New cases of HIV averted due to MMT<br>(estimates based on the number of risk acts [unsafe sex, drug injection, etc], percentage of protected acts and current prevalence of HIV) | Based on a published model (UNAIDS Mode of Transmission model) in which short term estimates of HIV incidence by transmission are modelled.     |
|                     | Outcomes related to ART (including                                                                                                                                                | Combination of publically available reference sources and healthcare                                                                            |

| Reference            | Outcome                                                          | Source                                                                                                                                                     |
|----------------------|------------------------------------------------------------------|------------------------------------------------------------------------------------------------------------------------------------------------------------|
|                      | retention on treatment, drop-off rates, viral suppression rates) | databases.                                                                                                                                                 |
| Zaric (2000)<br>[9]  | MMT outcomes                                                     | Based on sources found in literature based and reported in another reference by same authors. Assumptions were also made where multiple sources were found |
|                      | Mortality rates on MMT                                           |                                                                                                                                                            |
|                      | HIV transmission rates                                           |                                                                                                                                                            |
| Zaric (2000)<br>[10] | MMT treatment outcomes                                           | Based on published literature                                                                                                                              |
|                      | Sexual behaviour in IDU and non IDU                              |                                                                                                                                                            |
|                      | Injection drug behaviour                                         |                                                                                                                                                            |
|                      | HIV transmission rates                                           |                                                                                                                                                            |
|                      | Disease progression to AIDS                                      |                                                                                                                                                            |
| Zarkin (2005)        | Heroin use                                                       | Estimated based on published literature                                                                                                                    |

| Reference             | Outcome                               | Source                                                                                                                                                                                                                                                                                                                                |
|-----------------------|---------------------------------------|---------------------------------------------------------------------------------------------------------------------------------------------------------------------------------------------------------------------------------------------------------------------------------------------------------------------------------------|
| [11]                  |                                       |                                                                                                                                                                                                                                                                                                                                       |
|                       | Heroin treatment                      | Estimated based on published literature                                                                                                                                                                                                                                                                                               |
|                       | Crime rates                           | Estimated based on published literature                                                                                                                                                                                                                                                                                               |
|                       | Employment rates                      | Estimated based on published literature                                                                                                                                                                                                                                                                                               |
| Miller (2004)<br>[12] | Outcomes on MHPP                      | National statistics, open cohort study of IDU and Swiss Heroin study                                                                                                                                                                                                                                                                  |
| Adi (2007) [13]       | Treatment retention rates on NAL      | Meta-analysis of 5 RCTs                                                                                                                                                                                                                                                                                                               |
|                       | Level and nature of drug misuse       | One RCT                                                                                                                                                                                                                                                                                                                               |
|                       | Number injecting versus non-injecting | Based on evidence from the National Treatment Outcome Research Study (NTORS). This was a study carried out by the National Addiction Centre in England and Wales between the years 1995 and 2000 - the largest UK drug treatment outcome study at the time. This study followed up the clients of a variety of drug treatment service |

| Reference              | Outcome                                  | Source                                                                                                                                                                                                                                                                                                                                                                                                        |
|------------------------|------------------------------------------|---------------------------------------------------------------------------------------------------------------------------------------------------------------------------------------------------------------------------------------------------------------------------------------------------------------------------------------------------------------------------------------------------------------|
|                        |                                          | types for up to five years, examining a wide range of outcome measures.                                                                                                                                                                                                                                                                                                                                       |
| Connock<br>(2007) [14] | Treatment retention rates on BMT and MMT | Cochrane systematic review of buprenorphine maintenance versus placebo or methadone maintenance for opioid dependence                                                                                                                                                                                                                                                                                         |
|                        | Level and nature of drug misuse          |                                                                                                                                                                                                                                                                                                                                                                                                               |
|                        | Number injecting versus non-injecting    | Based on evidence from the National Treatment Outcome Research Study (NTORS). This was a study carried out by the National Addiction Centre in England and Wales between the years 1995 and 2000 - the largest UK drug treatment outcome study at the time. This study followed up the clients of a variety of drug treatment service types for up to five years, examining a wide range of outcome measures. |
| Schering-Plough (2007) | Treatment retention rates on BMT         | Based on a randomized double-blind trial with 405 opioid-dependent patients in which buprenorphine was compared to methadone                                                                                                                                                                                                                                                                                  |

| Reference | Outcome | Source              |
|-----------|---------|---------------------|
| [15]      |         | maintenance therapy |

BMT, buprenorphine maintenance treatment; BUP/NAL, buprenorphine-naloxone combination; DBS, deep brain stimulation; HCV, hepatitis C virus; HIV, human immunodeficiency virus; IDU, injecting drug user; MHPP, Medical Heroin Prescription Program; MMT, methadone maintenance treatment; NAL, naltrexone; RCT, randomised controlled trial; UK, United Kingdom; US, United States

## References

1. Barnett PG. The cost-effectiveness of methadone maintenance as a health care intervention. *Addiction*. 1999;94:479-88.
2. Barnett PG, Zaric GS, Brandeau ML. The cost-effectiveness of buprenorphine maintenance therapy for opiate addiction in the United States. *Addiction*. 2001;96:1267-78.
3. Masson CL, Barnett PG, Sees KL, Delucchi KL, Rosen A, Wong W et al. Cost and cost-effectiveness of standard methadone maintenance treatment compared to enriched 180-day methadone detoxification. *Addiction*. 2004;99:718-26.
4. Negrin MA, Vazquez-Polo FJ. Bayesian cost-effectiveness analysis with two measures of effectiveness: the cost-effectiveness acceptability plane. *Health Econ*. 2006;15:363-72.
5. Schackman BR, Leff JA, Polsky D, Moore BA, Fiellin DA. Cost-effectiveness of long-term outpatient buprenorphine-naloxone treatment for opioid dependence in primary care. *J Gen Intern Med*. 2012;27:669-76.

6. Sheerin IG, Green FT, Sellman JD. What is the cost-effectiveness of hepatitis C treatment for injecting drug users on methadone maintenance in New Zealand? *Drug Alcohol Rev.* 2004;23:261-72.
7. Stephen JH, Halpern CH, Barrios CJ, Balmuri U, Pisapia JM, Wolf JA et al. Deep brain stimulation compared with methadone maintenance for the treatment of heroin dependence: a threshold and cost-effectiveness analysis. *Addiction.* 2012;107:624-34.
8. Tran BX, Ohinmaa A, Duong AT, Nguyen LT, Vu PX, Mills S et al. The cost-effectiveness and budget impact of Vietnam's methadone maintenance treatment programme in HIV prevention and treatment among injection drug users. *Glob Public Health.* 2012;7:1080-94.
9. Zaric GS, Barnett PG, Brandeau ML. HIV transmission and the cost-effectiveness of methadone maintenance. *Am J Public Health.* 2000;90:1100-11.
10. Zaric GS, Brandeau ML, Barnett PG. Methadone maintenance and HIV prevention: A cost-effectiveness analysis. *Manage Sci.* 2000;46:1013-31.
11. Zarkin GA, Dunlap LJ, Hicks KA, Mamo D. Benefits and costs of methadone treatment: results from a lifetime simulation model. *Health Econ.* 2005;14:1133-50.
12. Miller CL, Schechter MT, Wood E, Spittal PM, Li K, Laliberte N et al. The potential health and economic impact of implementing a medically prescribed heroin program among Canadian injection drug users. *Int J Drug Policy.* 2004;15:259-63.
13. Adi Y, Juarez-Garcia A, Wang D, Jowett S, Frew E, Day E et al. Oral naltrexone as a treatment for relapse prevention in formerly opioid-dependent drug users: a systematic review and economic evaluation. *Health Technol Assess.* 2007;11:iii-iv, 1-85.

14. Connock M, Juarez-Garcia A, Jowett S, Frew E, Liu Z, Taylor RJ et al. Methadone and buprenorphine for the management of opioid dependence: a systematic review and economic evaluation. *Health Technol Assess.* 2007;11:1-171, iii-iv.
15. Schering-Plough. Manufacturer's submission. Cited in Connock et al. *Health Technol Assess.* 2007;11:1-171, iii-iv.
