# Supplementary material for: A systematic review of health economic models of opioid agonist therapies in maintenance treatment of non-prescription opioid dependence
Source: Addict Sci Clin Pract. 2017 Feb 24;12:6. doi: 10.1186/s13722-017-0071-3 (PMC5324212; doi:10.1186/s13722-017-0071-3)
Supplement: Supplementary file 6 — Additional file 6. Summary of resource utilisation and costs. [file 13722_2017_71_MOESM6_ESM.pdf]

## Additional File 6. Summary of resource utilisation and costs

| Reference             | Details                                                                                      | Source/Notes                                                                                                                   |
|-----------------------|----------------------------------------------------------------------------------------------|--------------------------------------------------------------------------------------------------------------------------------|
| Barnett (1999)<br>[1] | MMT costs                                                                                    | Based on average cost of MMT in the US. Costs provided as summary estimate, no details on constituent components of this cost. |
| Barnett (2001)<br>[2] | Drug costs                                                                                   | No costs were available at the time, so authors estimated plausible range for take home buprenorphine.                         |
|                       | Urinalysis, specialised dispensary costs, physician evaluations, psychological interventions | Based on published data on evaluation of methadone programmes by same authors                                                  |
|                       | HIV medication and treatment                                                                 | NR                                                                                                                             |
|                       | Cost of treatment of co-morbid illnesses                                                     | NR                                                                                                                             |
| Masson (2004) [3]     | Methadone treatment costs including counselling, education, ongoing medical care, dispensing | Resource use based on microcosting from an RCT comparing MMT to 180-day psychosocially enriched                                |

|                      |                                                                                                 |                                                                                                                                                                                        |
|----------------------|-------------------------------------------------------------------------------------------------|----------------------------------------------------------------------------------------------------------------------------------------------------------------------------------------|
|                      | costs and urine collection costs                                                                | detoxification for treatment of opioid dependence, the NTORS study - the largest UK drug treatment outcome study at the time (1995-2000), and local cost data for labour and wages     |
|                      | Capital and fixed costs including staff costs and facility costs                                |                                                                                                                                                                                        |
|                      | Healthcare utilisation including hospital stays, emergency room visits, ambulatory medical care |                                                                                                                                                                                        |
|                      | Substance abuse and mental health treatment costs                                               |                                                                                                                                                                                        |
| Schackman (2012) [4] | Medication costs                                                                                | Resource use and cost data obtained from same prospective observational study providing treatment retention rates and combination of published cost studies, and published unit costs. |
|                      | Provider costs including physician time, nursing time, overhead, laboratory testing)            |                                                                                                                                                                                        |
|                      | Patient costs (travel time, visit time, transport)                                              |                                                                                                                                                                                        |
| Sheerin (2004) [5]   | Methadone treatment costs including assessment and basic counselling                            | Based on costs of a methadone treatment centre                                                                                                                                         |

|                    |                                                                                                                                                                                                                        |                                                                                                             |
|--------------------|------------------------------------------------------------------------------------------------------------------------------------------------------------------------------------------------------------------------|-------------------------------------------------------------------------------------------------------------|
|                    | Operating costs of MMT (staff, facilities, lab testing)                                                                                                                                                                |                                                                                                             |
|                    | Cost of HCV treatment                                                                                                                                                                                                  | Based on data sourced from Australian Pharmaceutical Benefit Schedule                                       |
| Stephen (2012) [6] | MMT treatment                                                                                                                                                                                                          | Based on published source describing the cost of concordance with opiate substitution treatment guidelines. |
|                    | Societal costs of continued drug addiction including medical care, cost of complications and co-morbidities, support services, medical care for crime victims, productivity losses of victims and addicts, crime costs | Combination of publicly available reference sources and healthcare databases.                               |
|                    | DBS costs                                                                                                                                                                                                              | Combination of publicly available reference sources and healthcare databases.                               |
|                    | DBS complications                                                                                                                                                                                                      |                                                                                                             |
| Tran (2012)        | ART drug costs                                                                                                                                                                                                         | Vietnam Ministry of Health costing study of ART and                                                         |

|                       |                                                                 |                                                                                 |
|-----------------------|-----------------------------------------------------------------|---------------------------------------------------------------------------------|
| [7]                   |                                                                 | data sourced from the longitudinal cohort study across 6 MMT clinics in Vietnam |
|                       | Variable costs such as staff, MMT, urine tests and consumables) |                                                                                 |
|                       | Fixed costs such as facility costs, operating costs)            |                                                                                 |
| Zaric (2000)<br>[8]   | HIV care                                                        | US statistical data and published literature                                    |
|                       | Non-HIV related costs                                           |                                                                                 |
|                       | MMT                                                             |                                                                                 |
| Zaric (2000)<br>[9]   | MMT                                                             | Based on published literature and administration databases                      |
|                       | Non-HIV related costs                                           |                                                                                 |
|                       | HIV care costs                                                  |                                                                                 |
| Zarkin (2005)<br>[10] | MMT treatment                                                   | Based on previous publication by same authors                                   |

|                    |                                                                      |                                                                                                                                                  |
|--------------------|----------------------------------------------------------------------|--------------------------------------------------------------------------------------------------------------------------------------------------|
|                    | Costs associated with crime                                          | Published literature                                                                                                                             |
|                    | Productivity costs based on individual earnings                      | Published literature                                                                                                                             |
|                    | Healthcare costs including inpatient, outpatient and emergency costs | Published literature                                                                                                                             |
| Miller (2004) [11] | Hospitalisation and emergency use costs                              | Open cohort study and HIV Drug treatment programme                                                                                               |
|                    | Costs and resources associated with crime                            | Data from police force, open cohort study and public cost data                                                                                   |
|                    | Employment rates                                                     | Open cohort study                                                                                                                                |
| Adi (2007) [12]    | NAL treatment costs including counselling and urine tests            | Based on a randomized double-blind trial with 405 opioid-dependent patients in which buprenorphine was compared to methadone maintenance therapy |
|                    | Healthcare services, the CJS and employment                          | NTORS study - largest prospective longitudinal cohort study of treatment outcome for drug misusers ever conducted in the UK                      |
|                    | Healthcare resources such as GP visits, inpatient                    |                                                                                                                                                  |

|                             |                                                                                                |                                                                                                                                                  |
|-----------------------------|------------------------------------------------------------------------------------------------|--------------------------------------------------------------------------------------------------------------------------------------------------|
|                             | hospital stays, mental health visits and A&E                                                   |                                                                                                                                                  |
| Connock<br>(2007) [13]      | BMT and MMT treatment costs including counselling and urine tests                              | Based on a randomized double-blind trial with 405 opioid-dependent patients in which buprenorphine was compared to methadone maintenance therapy |
|                             | Healthcare services, the CJS and employment                                                    | NTORS study - largest prospective longitudinal cohort study of treatment outcome for drug misusers ever conducted in the UK                      |
|                             | Healthcare resources such as GP visits, inpatient hospital stays, mental health visits and A&E |                                                                                                                                                  |
| Schering-Plough (2007) [14] | BMT and MMT treatment costs including counselling and urine tests                              | Based on a randomized double-blind trial with 405 opioid-dependent patients in which buprenorphine was compared to methadone maintenance therapy |
|                             | Time to dispense and supervise methadone and buprenorphine                                     | Time in motion study                                                                                                                             |
|                             | Health care resource usage                                                                     | NTORS study - largest prospective longitudinal cohort study of treatment outcome for drug misusers ever conducted in the UK                      |

|                    |                                                    |                                                                      |
|--------------------|----------------------------------------------------|----------------------------------------------------------------------|
| SMC (2007)<br>[15] | Costs of BMT/NAL, BMT and MMT (oral and injection) | Data were taken from company SMC submission, NICE submission and SPC |
|--------------------|----------------------------------------------------|----------------------------------------------------------------------|

A&E, accident and emergency; ART, anti-retroviral treatment; BMT, buprenorphine maintenance treatment; CJS, criminal justice system; DBS, deep brain stimulation; GP, general practitioner; HCV, hepatitis C virus; MMT, methadone maintenance treatment; NAL, naltrexone; NICE, National Institute for Health and Care Excellence; NR, not reported; NTORS, National Treatment Outcome Research Study; RCT, randomised controlled trial; SMC, Scottish Medicines Consortium; SPC, summary of product characteristics; UK, United Kingdom.

## References

1. Barnett PG. The cost-effectiveness of methadone maintenance as a health care intervention. *Addiction*. 1999;94:479-88.
2. Barnett PG, Zaric GS, Brandeau ML. The cost-effectiveness of buprenorphine maintenance therapy for opiate addiction in the United States. *Addiction*. 2001;96:1267-78.
3. Masson CL, Barnett PG, Sees KL, Delucchi KL, Rosen A, Wong W et al. Cost and cost-effectiveness of standard methadone maintenance treatment compared to enriched 180-day methadone detoxification. *Addiction*. 2004;99:718-26.
4. Schackman BR, Leff JA, Polsky D, Moore BA, Fiellin DA. Cost-effectiveness of long-term outpatient buprenorphine-naloxone treatment for opioid dependence in primary care. *J Gen Intern Med*. 2012;27:669-76.
5. Sheerin IG, Green FT, Sellman JD. What is the cost-effectiveness of hepatitis C treatment for injecting drug users on methadone maintenance in New Zealand? *Drug Alcohol Rev*. 2004;23:261-72.
6. Stephen JH, Halpern CH, Barrios CJ, Balmuri U, Pisapia JM, Wolf JA et al. Deep brain stimulation compared with methadone maintenance for the treatment of heroin dependence: a threshold and cost-effectiveness analysis. *Addiction*. 2012;107:624-34.
7. Tran BX, Ohinmaa A, Duong AT, Nguyen LT, Vu PX, Mills S et al. The cost-effectiveness and budget impact of Vietnam's methadone maintenance treatment programme in HIV prevention and treatment among injection drug users. *Glob Public Health*. 2012;7:1080-94.
8. Zaric GS, Barnett PG, Brandeau ML. HIV transmission and the cost-effectiveness of methadone maintenance. *Am J Public Health*. 2000;90:1100-11.
9. Zaric GS, Brandeau ML, Barnett PG. Methadone maintenance and HIV prevention: A cost-effectiveness analysis. *Manage Sci*. 2000;46:1013-31.
10. Zarkin GA, Dunlap LJ, Hicks KA, Mamo D. Benefits and costs of methadone treatment: results from a lifetime simulation model. *Health Econ*. 2005;14:1133-50.
11. Miller CL, Schechter MT, Wood E, Spittal PM, Li K, Laliberte N et al. The potential health and economic impact of implementing a medically prescribed heroin program among Canadian injection drug users. *Int J Drug Policy*. 2004;15:259-63.
12. Adi Y, Juarez-Garcia A, Wang D, Jowett S, Frew E, Day E et al. Oral naltrexone as a treatment for relapse prevention in formerly opioid-dependent drug users: a systematic review and economic evaluation. *Health Technol Assess*. 2007;11:iii-iv, 1-85.
13. Connock M, Juarez-Garcia A, Jowett S, Frew E, Liu Z, Taylor RJ et al. Methadone and buprenorphine for the management of opioid dependence: a systematic review and economic evaluation. *Health Technol Assess*. 2007;11:1-171, iii-iv.
14. Schering-Plough. Manufacturer's submission. Cited in Connock et al. *Health Technol Assess*. 2007;11:1-171, iii-iv.
15. Scottish Medicines Consortium. Buprenorphine/naloxone 2mg/0.5mg, 8/2mg sublingual tablet (Suboxone). No. 355/07. 2007. [https://www.scottishmedicines.org.uk/files/buprenorphine\\_naloxone\\_sublingual\\_tablet\\_Suboxone\\_355-07\\_.pdf](https://www.scottishmedicines.org.uk/files/buprenorphine_naloxone_sublingual_tablet_Suboxone_355-07_.pdf). Accessed 3 Jun 2015.
